# Supplementary material for: Electronic patient-reported outcome measures to enable systematic follow-up in treatment and care of women diagnosed with breast cancer: a feasibility study protocol
Source: HighWire-hosted journal article supplement (doi:10.1136/bmjopen-2022-065110), 2022-11-01
Supplement: bmjopen-2022-065110supp001_data_supplement.pdf [file bmjopen-2022-065110supp001_data_supplement.pdf]

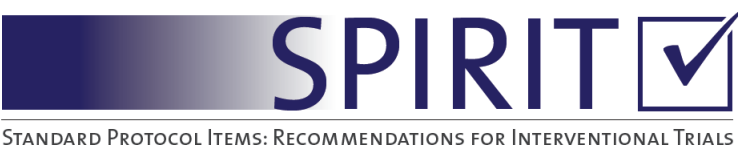

**SPIRIT 2013 AND SPIRIT-PRO EXTENSION CHECKLIST: RECOMMENDED ITEMS TO ADDRESS IN A CLINICAL TRIAL PROTOCOL AND RELATED DOCUMENTS\***

| SPIRIT Section/item               | SPIRIT Item No | SPIRIT Item Description                                                                                      | SPIRIT-PRO Item No        | SPIRIT-PRO Extension or Elaboration Item Description                      | Page ** |
|-----------------------------------|----------------|--------------------------------------------------------------------------------------------------------------|---------------------------|---------------------------------------------------------------------------|---------|
| <i>Administrative information</i> |                |                                                                                                              |                           |                                                                           |         |
| Title                             | 1              | Descriptive title identifying the study design, population, interventions, and, if applicable, trial acronym |                           |                                                                           | p.1     |
| Trial registration                | 2a             | Trial identifier and registry name. If not yet registered, name of intended registry                         |                           |                                                                           | -       |
|                                   | 2b             | All items from the World Health Organization Trial Registration Data Set                                     |                           |                                                                           | -       |
| Protocol version                  | 3              | Date and version identifier                                                                                  |                           |                                                                           | p.6     |
| Funding                           | 4              | Sources and types of financial, material, and other support                                                  |                           |                                                                           | p.19    |
| Roles and responsibilities        | 5a             | Names, affiliations, and roles of protocol contributors                                                      | SPIRIT-5a-PRO elaboration | Specify the individual(s) responsible for the PRO content of the protocol | p.19    |
|                                   | 5b             | Name and contact information for the trial sponsor                                                           |                           |                                                                           | -       |

|  |    |                                                                                                                                                                                                                                                                                          |  |  |   |
|--|----|------------------------------------------------------------------------------------------------------------------------------------------------------------------------------------------------------------------------------------------------------------------------------------------|--|--|---|
|  | 5c | Role of study sponsor and funders, if any, in study design; collection, management, analysis, and interpretation of data; writing of the report; and the decision to submit the report for publication, including whether they will have ultimate authority over any of these activities |  |  | - |
|  | 5d | Composition, roles, and responsibilities of the coordinating centre, steering committee, endpoint adjudication committee, data management team, and other individuals or groups overseeing the trial, if applicable (see Item 21a for data monitoring committee)                         |  |  | - |

Introduction

|                          |    |                                                                                                                                                                                                           |                         |                                                                                                                              |      |
|--------------------------|----|-----------------------------------------------------------------------------------------------------------------------------------------------------------------------------------------------------------|-------------------------|------------------------------------------------------------------------------------------------------------------------------|------|
| Background and rationale | 6a | Description of research question and justification for undertaking the trial, including summary of relevant studies (published and unpublished) examining benefits and harms for each intervention        | SPIRIT-6a-PRO Extension | Describe the PRO-specific research question and rationale for PRO assessment and summarize PRO findings in relevant studies. | p.6  |
|                          | 6b | Explanation for choice of comparators                                                                                                                                                                     |                         |                                                                                                                              | -    |
| Objectives               | 7  | Specific objectives or hypotheses                                                                                                                                                                         | SPIRIT-7-PRO Extension  | State the specific PRO objectives or hypothesis (including relevant PRO concepts/domains).                                   | p.16 |
| Trial design             | 8  | Description of trial design including type of trial (eg, parallel group, crossover, factorial, single group), allocation ratio, and framework (eg, superiority, equivalence, noninferiority, exploratory) |                         |                                                                                                                              | p.2  |

Methods: Participants, interventions, and outcomes

|                      |     |                                                                                                                                                                                                                                                                                                                                                                                |                            |                                                                                                                                                                                                                                                                                                      |      |
|----------------------|-----|--------------------------------------------------------------------------------------------------------------------------------------------------------------------------------------------------------------------------------------------------------------------------------------------------------------------------------------------------------------------------------|----------------------------|------------------------------------------------------------------------------------------------------------------------------------------------------------------------------------------------------------------------------------------------------------------------------------------------------|------|
| Study setting        | 9   | Description of study settings (eg, community clinic, academic hospital) and list of countries where data will be collected. Reference to where list of study sites can be obtained                                                                                                                                                                                             |                            |                                                                                                                                                                                                                                                                                                      | p.6  |
| Eligibility criteria | 10  | Inclusion and exclusion criteria for participants. If applicable, eligibility criteria for study centres and individuals who will perform the interventions (eg, surgeons, psychotherapists)                                                                                                                                                                                   | SPIRIT-10-PRO<br>Extension | Specify any PRO-specific eligibility criteria (eg, language/reading requirements or prerandomization completion of PRO). If PROs will not be collected from the entire study sample, provide a rationale and describe the method for obtaining the PRO subsample                                     | p.8  |
| Interventions        | 11a | Interventions for each group with sufficient detail to allow replication, including how and when they will be administered                                                                                                                                                                                                                                                     |                            |                                                                                                                                                                                                                                                                                                      | p.14 |
|                      | 11b | Criteria for discontinuing or modifying allocated interventions for a given trial participant (eg, drug dose change in response to harms, participant request, or improving/worsening disease)                                                                                                                                                                                 |                            |                                                                                                                                                                                                                                                                                                      | -    |
|                      | 11c | Strategies to improve adherence to intervention protocols, and any procedures for monitoring adherence (eg, drug tablet return, laboratory tests)                                                                                                                                                                                                                              |                            |                                                                                                                                                                                                                                                                                                      | p.10 |
|                      | 11d | Relevant concomitant care and interventions that are permitted or prohibited during the trial                                                                                                                                                                                                                                                                                  |                            |                                                                                                                                                                                                                                                                                                      | -    |
| Outcomes             | 12  | Primary, secondary, and other outcomes, including the specific measurement variable (eg, systolic blood pressure), analysis metric (eg, change from baseline, final value, time to event), method of aggregation (eg, median, proportion), and time point for each outcome. Explanation of the clinical relevance of chosen efficacy and harm outcomes is strongly recommended | SPIRIT-12-PRO<br>Extension | Specify the PRO concepts/domains used to evaluate the intervention (eg, overall health-related quality of life, specific domain, specific symptom) and, for each one, the analysis metric (eg, change from baseline, final value, time to event) and the principal time point or period of interest. | p.15 |

|                      |    |                                                                                                                                                                                       |                           |                                                                                                                                                                                                                                                                                                                                 |        |
|----------------------|----|---------------------------------------------------------------------------------------------------------------------------------------------------------------------------------------|---------------------------|---------------------------------------------------------------------------------------------------------------------------------------------------------------------------------------------------------------------------------------------------------------------------------------------------------------------------------|--------|
| Participant timeline | 13 | Time schedule of enrolment, interventions (including any run-ins and washouts), assessments, and visits for participants. A schematic diagram is highly recommended (see Figure)      | SPIRIT-13-PRO Extension   | Include a schedule of PRO assessments, providing a rationale for the time points, and justifying if the initial assessment is not prerandomization. Specify time windows, whether PRO collection is prior to clinical assessments, and, if using multiple questionnaires, whether order of administration will be standardized. | Fig. 2 |
| Sample size          | 14 | Estimated number of participants needed to achieve study objectives and how it was determined, including clinical and statistical assumptions supporting any sample size calculations | SPIRIT-14-PRO Elaboration | When a PRO is the primary end point, state the required sample size (and how it was determined) and recruitment target (accounting for expected loss to follow-up). If sample size is not established based on the PRO end point, then discuss the power of the principal PRO analyses.                                         | p.9    |
| Recruitment          | 15 | Strategies for achieving adequate participant enrolment to reach target sample size                                                                                                   |                           |                                                                                                                                                                                                                                                                                                                                 | p.9    |

***Methods: Assignment of interventions (for controlled trials)***

Allocation:

|                                  |     |                                                                                                                                                                                                                                                                                                                                                          |  |  |   |
|----------------------------------|-----|----------------------------------------------------------------------------------------------------------------------------------------------------------------------------------------------------------------------------------------------------------------------------------------------------------------------------------------------------------|--|--|---|
| Sequence generation              | 16a | Method of generating the allocation sequence (eg, computer-generated random numbers), and list of any factors for stratification. To reduce predictability of a random sequence, details of any planned restriction (eg, blocking) should be provided in a separate document that is unavailable to those who enrol participants or assign interventions |  |  | - |
| Allocation concealment mechanism | 16b | Mechanism of implementing the allocation sequence (eg, central telephone; sequentially numbered, opaque, sealed envelopes), describing any steps to conceal the sequence until interventions are assigned                                                                                                                                                |  |  | - |

|                                                           |     |                                                                                                                                                                                                                                                                                                                                                                                                              |                               |                                                                                                                                                                                                                                                                                                                                                                                                                                                                                                                                    |
|-----------------------------------------------------------|-----|--------------------------------------------------------------------------------------------------------------------------------------------------------------------------------------------------------------------------------------------------------------------------------------------------------------------------------------------------------------------------------------------------------------|-------------------------------|------------------------------------------------------------------------------------------------------------------------------------------------------------------------------------------------------------------------------------------------------------------------------------------------------------------------------------------------------------------------------------------------------------------------------------------------------------------------------------------------------------------------------------|
| Implementation                                            | 16c | Who will generate the allocation sequence, who will enrol participants, and who will assign participants to interventions                                                                                                                                                                                                                                                                                    |                               | -                                                                                                                                                                                                                                                                                                                                                                                                                                                                                                                                  |
| Blinding (masking)                                        | 17a | Who will be blinded after assignment to interventions (eg, trial participants, care providers, outcome assessors, data analysts), and how                                                                                                                                                                                                                                                                    |                               | -                                                                                                                                                                                                                                                                                                                                                                                                                                                                                                                                  |
|                                                           | 17b | If blinded, circumstances under which unblinding is permissible, and procedure for revealing a participant’s allocated intervention during the trial                                                                                                                                                                                                                                                         |                               | -                                                                                                                                                                                                                                                                                                                                                                                                                                                                                                                                  |
| <b>Methods: Data collection, management, and analysis</b> |     |                                                                                                                                                                                                                                                                                                                                                                                                              |                               | p.15                                                                                                                                                                                                                                                                                                                                                                                                                                                                                                                               |
| Data collection methods                                   | 18a | Plans for assessment and collection of outcome, baseline, and other trial data, including any related processes to promote data quality (eg, duplicate measurements, training of assessors) and a description of study instruments (eg, questionnaires, laboratory tests) along with their reliability and validity, if known. Reference to where data collection forms can be found, if not in the protocol | SPIRIT-18a (i)-PRO Extension  | Justify the PRO instrument to be used and describe domains, number of items, recall period, and instrument scaling and scoring (eg, range and direction of scores indicating a good or poor outcome). Evidence of PRO instrument measurement properties, interpretation guidelines, and patient acceptability and burden should be provided or cited if available, ideally in the population of interest. State whether the measure will be used in accordance with any user manual and specify and justify deviations if planned. |
|                                                           |     |                                                                                                                                                                                                                                                                                                                                                                                                              | SPIRIT-18a (ii)-PRO Extension | Include a data collection plan outlining the permitted mode(s) of administration (eg, paper, telephone, electronic, other) and setting (eg, clinic, home, other).                                                                                                                                                                                                                                                                                                                                                                  |
|                                                           |     |                                                                                                                                                                                                                                                                                                                                                                                                              |                               | p.15                                                                                                                                                                                                                                                                                                                                                                                                                                                                                                                               |

|                     |     |                                                                                                                                                                                                                                                                   |                                       |                                                                                                                                                                                                                                                               |             |
|---------------------|-----|-------------------------------------------------------------------------------------------------------------------------------------------------------------------------------------------------------------------------------------------------------------------|---------------------------------------|---------------------------------------------------------------------------------------------------------------------------------------------------------------------------------------------------------------------------------------------------------------|-------------|
|                     |     |                                                                                                                                                                                                                                                                   | SPIRIT-18a<br>(iii)-PRO<br>Extension  | Specify whether more than 1 language version will be used and state whether translated versions have been developed using currently recommended methods.                                                                                                      | p.8         |
|                     |     |                                                                                                                                                                                                                                                                   | SPIRIT-18a<br>(iv)-PRO<br>Extension   | When the trial context requires someone other than a trial participant to answer on his or her behalf (a proxy-reported outcome), state and justify the use of a proxy respondent. Provide or cite evidence of the validity of proxy assessment if available. | -           |
|                     | 18b | Plans to promote participant retention and complete follow-up, including list of any outcome data to be collected for participants who discontinue or deviate from intervention protocols                                                                         | SPIRIT-18b<br>(i)-PRO<br>Extension    | Specify PRO data collection and management strategies for minimizing avoidable missing data.                                                                                                                                                                  | p.10        |
|                     |     |                                                                                                                                                                                                                                                                   | SPIRIT-18b<br>(ii)-PRO<br>Elaboration | Describe the process of PRO assessment for participants who discontinue or deviate from the assigned intervention protocol.                                                                                                                                   | p.10        |
| Data management     | 19  | Plans for data entry, coding, security, and storage, including any related processes to promote data quality (eg, double data entry; range checks for data values). Reference to where details of data management procedures can be found, if not in the protocol |                                       |                                                                                                                                                                                                                                                               | p.10,<br>17 |
| Statistical methods | 20a | Statistical methods for analysing primary and secondary outcomes. Reference to where other details of the statistical analysis plan can be found, if not in the protocol                                                                                          | SPIRIT-20a-PRO<br>Elaboration         | State PRO analysis methods, including any plans for addressing multiplicity/type I ( $\alpha$ ) error.                                                                                                                                                        | p.17        |

|                            |     |                                                                                                                                                                                                                                                                                                                                       |                            |                                                                                                                                                                                                                                                                                                                   |      |
|----------------------------|-----|---------------------------------------------------------------------------------------------------------------------------------------------------------------------------------------------------------------------------------------------------------------------------------------------------------------------------------------|----------------------------|-------------------------------------------------------------------------------------------------------------------------------------------------------------------------------------------------------------------------------------------------------------------------------------------------------------------|------|
|                            | 20b | Methods for any additional analyses (eg, subgroup and adjusted analyses)                                                                                                                                                                                                                                                              |                            |                                                                                                                                                                                                                                                                                                                   |      |
|                            | 20c | Definition of analysis population relating to protocol non-adherence (eg, as randomised analysis), and any statistical methods to handle missing data (eg, multiple imputation)                                                                                                                                                       | SPIRIT-20c-PRO Elaboration | State how missing data will be described and outline the methods for handling missing items or entire assessments (eg, approach to imputation and sensitivity analyses).                                                                                                                                          | p.17 |
| <b>Methods: Monitoring</b> |     |                                                                                                                                                                                                                                                                                                                                       |                            |                                                                                                                                                                                                                                                                                                                   |      |
| Data monitoring            | 21a | Composition of data monitoring committee (DMC); summary of its role and reporting structure; statement of whether it is independent from the sponsor and competing interests; and reference to where further details about its charter can be found, if not in the protocol. Alternatively, an explanation of why a DMC is not needed |                            |                                                                                                                                                                                                                                                                                                                   | p.11 |
|                            | 21b | Description of any interim analyses and stopping guidelines, including who will have access to these interim results and make the final decision to terminate the trial                                                                                                                                                               |                            |                                                                                                                                                                                                                                                                                                                   | -    |
| Harms                      | 22  | Plans for collecting, assessing, reporting, and managing solicited and spontaneously reported adverse events and other unintended effects of trial interventions or trial conduct                                                                                                                                                     | SPIRIT-22-PRO Extension    | State whether or not PRO data will be monitored during the study to inform the clinical care of individual trial participants and, if so, how this will be managed in a standardized way. Describe how this process will be explained to participants; eg, in the participant information sheet and consent form. | p.12 |
| Auditing                   | 23  | Frequency and procedures for auditing trial conduct, if any, and whether the process will be independent from investigators and the sponsor                                                                                                                                                                                           |                            |                                                                                                                                                                                                                                                                                                                   | -    |

***Ethics and dissemination***

|                               |     |                                                                                                                                                                                                                                  |      |
|-------------------------------|-----|----------------------------------------------------------------------------------------------------------------------------------------------------------------------------------------------------------------------------------|------|
| Research ethics approval      | 24  | Plans for seeking research ethics committee/institutional review board (REC/IRB) approval                                                                                                                                        | p.19 |
| Protocol amendments           | 25  | Plans for communicating important protocol modifications (eg, changes to eligibility criteria, outcomes, analyses) to relevant parties (eg, investigators, REC/IRBs, trial participants, trial registries, journals, regulators) | p.11 |
| Consent or assent             | 26a | Who will obtain informed consent or assent from potential trial participants or authorised surrogates, and how (see Item 32)                                                                                                     | p.17 |
|                               | 26b | Additional consent provisions for collection and use of participant data and biological specimens in ancillary studies, if applicable                                                                                            | -    |
| Confidentiality               | 27  | How personal information about potential and enrolled participants will be collected, shared, and maintained in order to protect confidentiality before, during, and after the trial                                             | p.3  |
| Declaration of interests      | 28  | Financial and other competing interests for principal investigators for the overall trial and each study site                                                                                                                    | p.18 |
| Access to data                | 29  | Statement of who will have access to the final trial dataset, and disclosure of contractual agreements that limit such access for investigators                                                                                  | p.6  |
| Ancillary and post-trial care | 30  | Provisions, if any, for ancillary and post-trial care, and for compensation to those who suffer harm from trial participation                                                                                                    | -    |



|                      |     |                                                                                                                                                                                                                                                                                     |      |
|----------------------|-----|-------------------------------------------------------------------------------------------------------------------------------------------------------------------------------------------------------------------------------------------------------------------------------------|------|
| Dissemination policy | 31a | Plans for investigators and sponsor to communicate trial results to participants, healthcare professionals, the public, and other relevant groups (eg, via publication, reporting in results databases, or other data sharing arrangements), including any publication restrictions | p.18 |
|                      | 31b | Authorship eligibility guidelines and any intended use of professional writers                                                                                                                                                                                                      | -    |
|                      | 31c | Plans, if any, for granting public access to the full protocol, participant-level dataset, and statistical code                                                                                                                                                                     | -    |

### Appendices

|                            |    |                                                                                                                                                                                                |   |
|----------------------------|----|------------------------------------------------------------------------------------------------------------------------------------------------------------------------------------------------|---|
| Informed consent materials | 32 | Model consent form and other related documentation given to participants and authorised surrogates                                                                                             | - |
| Biological specimens       | 33 | Plans for collection, laboratory evaluation, and storage of biological specimens for genetic or molecular analysis in the current trial and for future use in ancillary studies, if applicable | - |

\*It is strongly recommended that this checklist be read in conjunction with the SPIRIT 2013 Explanation & Elaboration for important clarification on the items. Amendments to the protocol should be tracked and dated. The SPIRIT checklist is copyrighted by the SPIRIT Group under the Creative Commons “[Attribution-NonCommercial-NoDerivs 3.0 Unported](#)” license.

\*\*page numbers refers to protocol paper
